# Supplementary material for: Impact of Enniatin and Deoxynivalenol Co-Occurrence on Plant, Microbial, Insect, Animal and Human Systems: Current Knowledge and Future Perspectives
Source: MDPI journal article supplement (doi:10.3390/toxins15040271), 2023-04-06
Supplement: s1 [file s1]

**Impact of enniatin and deoxynivalenol co-occurrence on plant, microbial, insect, animal and human systems: current knowledge and future perspectives” by Irene Valenti <sup>1</sup>, Francesco Tini <sup>2,\*</sup>, Milos Sevarika <sup>2</sup>, Alessandro Agazzi <sup>3</sup>, Giovanni Beccari <sup>2</sup>, Ilaria Bellezza <sup>4</sup>, Luisa Ederli <sup>2</sup>, Silvia Grottelli <sup>4</sup>, Matias Pasquali <sup>1</sup>, Roberto Romani <sup>2</sup>, Marco Saracchi <sup>2</sup>, and Lorenzo Covarelli <sup>2</sup>**

<sup>1</sup> Department of Food, Environmental and Nutritional Sciences, University of Milan, 20133 Milan, Italy;

<sup>2</sup> Department of Agricultural, Food and Environmental Sciences, University of Perugia, 06121 Perugia, Italy;

<sup>3</sup> Department of Veterinary Medicine and Animal Sciences, University of Milan, 26900 Lodi, Italy;

<sup>4</sup> Department of Medicine and Surgery, University of Perugia, 06132 Perugia, Italy.

\*Correspondence: francesco.tini@unipg.it

**Supplementary Table S1: In vitro effects of ENNs on microorganisms.**

\* = not sensitivity at the highest test concentration; <sup>a</sup> = MIC value; <sup>b</sup> = IC<sub>50</sub> value.

|          | Species/Cell line                              | Sensitivity             | ENN type | Reference |
|----------|------------------------------------------------|-------------------------|----------|-----------|
| Bacteria | <i>Cryptococcus neoformans</i> ATCC 90113      | 12.5 µg/ml <sup>a</sup> | ENA      | 195       |
|          |                                                | 12.5 µg/ml <sup>a</sup> | ENA1     |           |
|          |                                                | 25 µg/ml <sup>a</sup>   | ENB1     |           |
|          | <i>Clostridium perfringens</i> CECT 4647       | 0.2 µg <sup>a</sup>     | ENB      | 122       |
|          | <i>Enterococcus faecium</i> CECT 410           | 2000 µg <sup>a</sup>    |          |           |
|          | <i>Escherichia coli</i> CECT 4782              | >2000 µg <sup>a*</sup>  |          |           |
|          | <i>Listeria monocytogenes</i> CECT 935         | 2000 µg <sup>a</sup>    |          |           |
|          | <i>Pseudomonas aeruginosa</i> CECT 4628        | 2000 µg <sup>a</sup>    |          |           |
|          | <i>Salmonella enterica</i> CECT 554            | 200 µg <sup>a</sup>     |          |           |
|          | <i>Shigella dysenteriae</i> CECT 584           | >2000 µg <sup>a*</sup>  |          |           |
|          | <i>Staphylococcus aureus</i> CECT 240          | >2000 µg <sup>a*</sup>  |          |           |
|          | <i>Staphylococcus aureus</i> CECT 976          | 0.2 µg <sup>a</sup>     |          |           |
|          | <i>Yersinia enterocolitica</i> CECT 4054       | 2000 µg <sup>a</sup>    |          |           |
|          | <i>Mycobacterium intracellulare</i> ATCC 23068 | 50 µg/ml <sup>a</sup>   | ENA      | 195       |
|          |                                                | 50 µg/ml <sup>a</sup>   | ENA1     |           |
|          |                                                | >50 µg/ml <sup>a*</sup> | ENB1     |           |
|          | <i>Mycobacterium tuberculosis</i> H37Ra        | 3.12 µg/ml <sup>a</sup> | ENB      | 120       |
|          |                                                | 3.12 µg/ml <sup>a</sup> | ENB4     |           |
|          |                                                | 6.25 µg/ml <sup>a</sup> | ENC      |           |
|          |                                                | 6.25 µg/ml <sup>a</sup> | ENG      |           |
|          |                                                | 6.25 µg/ml <sup>a</sup> | ENH      |           |
|          |                                                | 6.25 µg/ml <sup>a</sup> | ENI      |           |

|                                                      |                         |      |     |
|------------------------------------------------------|-------------------------|------|-----|
| <i>Mycobacterium tuberculosis</i> H37Ra<br>ATCC25177 | 2 µg/ml <sup>a</sup>    | ENA1 | 119 |
| <i>Mycobacterium tuberculosis</i> H37Rv<br>ATCC27294 | 1 µg/ml <sup>a</sup>    |      |     |
| <i>Mycobacterium bovis</i> ATCC19210                 | 2 µg/ml <sup>a</sup>    |      |     |
| <i>Mycobacterium bovis</i> BGC ATCC35737             | 2 µg/ml <sup>a</sup>    |      |     |
| <i>Mycobacterium smegmatis</i> mc <sup>2</sup> 155   | 8 µg/ml <sup>a</sup>    |      |     |
| <i>Escherichia coli</i> ATCC25922                    | >100 µg/ml <sup>a</sup> |      |     |
| <i>Klebsiella pneumonia</i> CTCC46117                | >100 µg/ml <sup>a</sup> |      |     |
| <i>Listeria monocytogenes</i> ATCC19115              | >100 µg/ml <sup>a</sup> |      |     |
| <i>Pseudomonas aeruginosa</i> ATCC9027               | >100 µg/ml <sup>a</sup> |      |     |
| <i>Staphylococcus aureus</i> ATCC75923               | >100 µg/ml <sup>a</sup> |      |     |
| <i>Bifidobacterium adolescentis</i> CECT 5781        | >1000 ng <sup>a*</sup>  | ENJ1 | 127 |
| <i>Bifidobacterium bifidum</i> CECT 870T             | 10 ng <sup>a</sup>      |      |     |
| <i>Bifidobacterium breve</i> CECT 4839T              | 100 ng <sup>a</sup>     |      |     |
| <i>Bifidobacterium longum</i> CECT 4551              | 1000 ng <sup>a</sup>    |      |     |
| <i>Clostridium perfringens</i> CECT 4647             | 100 ng <sup>a</sup>     |      |     |
| <i>Enterococcus faecium</i> CECT 410                 | 10 ng <sup>a</sup>      |      |     |
| <i>Escherichia coli</i> CECT 4782                    | >1000 ng <sup>a*</sup>  |      |     |
| <i>Lactobacillus animalis</i> CECT 4060T             | 100 ng <sup>a</sup>     |      |     |
| <i>Lactobacillus casei</i> CECT 475                  | 1000 ng <sup>a</sup>    |      |     |
| <i>Lactobacillus casei subsp. casei</i> CECT 475     | 1000 ng <sup>a</sup>    |      |     |
| <i>Lactobacillus casei rhamnosus</i> CECT 278T       | 10 ng <sup>a</sup>      |      |     |
| <i>Lactobacillus plantarum</i> CECT 220              | 10 ng <sup>a</sup>      |      |     |
| <i>Lactobacillus ruminis</i> CECT 4061T              | 1000 ng <sup>a</sup>    |      |     |
| <i>Listeria monocytogenes</i> CECT 935               | >1000 ng <sup>a*</sup>  |      |     |
| <i>Pseudomonas aeruginosa</i> CECT 4628              | >1000 ng <sup>a*</sup>  |      |     |
| <i>Salmonella enterica</i> CECT 554                  | >1000 ng <sup>a*</sup>  |      |     |
| <i>Shigella dysenteriae</i> CECT 584                 | 100 ng <sup>a</sup>     |      |     |
| <i>Staphylococcus aureus</i> CECT 976                | 1000 ng <sup>a</sup>    |      |     |
| <i>Staphylococcus aureus</i> CECT 240                | 1000 ng <sup>a</sup>    |      |     |
| <i>Yersinia enterocolitica</i> CECT 4054             | 100 ng <sup>a</sup>     |      |     |
| <i>Bifidobacterium adolescentis</i> CECT 5781        | 1000 ng <sup>a</sup>    | ENJ3 |     |

|  |                                                  |                          |      |     |
|--|--------------------------------------------------|--------------------------|------|-----|
|  | <i>Bifidobacterium bifidum</i> CECT 870T         | 10 ng <sup>a</sup>       |      |     |
|  | <i>Bifidobacterium breve</i> CECT 4839T          | >1000 ng <sup>a*</sup>   |      |     |
|  | <i>Bifidobacterium longum</i> CECT 4551          | 10 ng <sup>a</sup>       |      |     |
|  | <i>Clostridium perfringens</i> CECT 4647         | 1000 ng <sup>a</sup>     |      |     |
|  | <i>Enterococcus faecium</i> CECT 410             | 1000 ng <sup>a</sup>     |      |     |
|  | <i>Escherichia coli</i> CECT 4782                | 1000 ng <sup>a</sup>     |      |     |
|  | <i>Lactobacillus animalis</i> CECT 4060T         | 10 ng <sup>a</sup>       |      |     |
|  | <i>Lactobacillus casei</i> CECT 475              | 100 ng <sup>a</sup>      |      |     |
|  | <i>Lactobacillus casei subsp. casei</i> CECT 475 | 1000 ng <sup>a</sup>     |      |     |
|  | <i>Lactobacillus casei rhamnosus</i> CECT 278T   | 1000 ng <sup>a</sup>     |      |     |
|  | <i>Lactobacillus plantarum</i> CECT 220          | 1000 ng <sup>a</sup>     |      |     |
|  | <i>Lactobacillus ruminis</i> CECT 4061T          | 1000 ng <sup>a</sup>     |      |     |
|  | <i>Listeria monocytogenes</i> CECT 935           | >1000 ng <sup>a*</sup>   |      |     |
|  | <i>Pseudomonas aeruginosa</i> CECT 4628          | >1000 ng <sup>a*</sup>   |      |     |
|  | <i>Salmonella enterica</i> CECT 554              | >1000 ng <sup>a*</sup>   |      |     |
|  | <i>Shigella dysenteriae</i> CECT 584             | 10 ng <sup>a</sup>       |      |     |
|  | <i>Staphylococcus aureus</i> CECT 976            | >1000 ng <sup>a*</sup>   |      |     |
|  | <i>Staphylococcus aureus</i> CECT 240            | 10 ng <sup>a</sup>       |      |     |
|  | <i>Yersinia enterocolitica</i> CECT 4054         | >1000 ng <sup>a*</sup>   |      |     |
|  | <i>Bifidobacterium adolescentis</i> 5871         | >20,000 ng <sup>a*</sup> | ENA  | 101 |
|  |                                                  | >20,000 ng <sup>a*</sup> | ENA1 |     |
|  |                                                  | >20,000 ng <sup>a*</sup> | ENA2 |     |
|  |                                                  | 20 ng <sup>a</sup>       | ENB1 |     |
|  | <i>Bifidobacterium bifidum</i> 870T              | >20,000 ng <sup>a*</sup> | ENA  |     |
|  |                                                  | 20,000 ng <sup>a</sup>   | ENA1 |     |
|  |                                                  | >20,000 ng <sup>a*</sup> | ENA2 |     |
|  |                                                  | 20,000 ng <sup>a</sup>   | ENB1 |     |
|  | <i>Bifidobacterium breve</i> 4839T               | >20,000 ng <sup>a*</sup> | ENA  |     |
|  |                                                  | 20,000 ng <sup>a</sup>   | ENA1 |     |
|  |                                                  | >20,000 ng <sup>a*</sup> | ENA2 |     |
|  |                                                  | >20,000 ng <sup>a*</sup> | ENB1 |     |
|  | <i>Bifidobacterium longum</i> 4551               | >20,000 ng <sup>a*</sup> | ENA  |     |
|  |                                                  | 20,000 ng <sup>a</sup>   | ENA1 |     |

|          |                                        |                                    |                          |                                   |     |
|----------|----------------------------------------|------------------------------------|--------------------------|-----------------------------------|-----|
|          |                                        |                                    | >20,000 ng <sup>a*</sup> | ENA2                              |     |
|          |                                        |                                    | 20,000 ng <sup>a</sup>   | ENB1                              |     |
|          | <i>Lactobacillus casei</i> 4180        |                                    | >20,000 ng <sup>a*</sup> | ENA                               |     |
|          |                                        |                                    | 20,000 ng <sup>a</sup>   | ENA1                              |     |
|          |                                        |                                    | >20,000 ng <sup>a*</sup> | ENA2                              |     |
|          |                                        |                                    | >20,000 ng <sup>a*</sup> | ENB1                              |     |
|          | <i>Lactobacillus casei- casei</i> 4180 |                                    | >20,000 ng <sup>a*</sup> | ENA                               |     |
|          |                                        |                                    | 20,000 ng <sup>a</sup>   | ENA1                              |     |
|          |                                        |                                    | >20,000 ng <sup>a*</sup> | ENA2                              |     |
|          |                                        |                                    | 20,000 ng <sup>a</sup>   | ENB1                              |     |
|          | <i>Lactobacillus rhamnosus</i> 278T    |                                    | >20,000 ng <sup>a*</sup> | ENA                               |     |
|          |                                        |                                    | 20,000 ng <sup>a</sup>   | ENA1                              |     |
|          |                                        |                                    | >20,000 ng <sup>a*</sup> | ENA2                              |     |
|          |                                        |                                    | >20,000 ng <sup>a*</sup> | ENB1                              |     |
|          | <i>Lactobacillus ruminis</i> 4061 T    |                                    | >20,000 ng <sup>a*</sup> | ENA                               |     |
|          |                                        |                                    | 20,000 ng <sup>a</sup>   | ENA1                              |     |
|          |                                        |                                    | >20,000 ng <sup>a*</sup> | ENA2                              |     |
|          |                                        |                                    | 20,000 ng <sup>a</sup>   | ENB1                              |     |
|          | <i>Streptococcus thermophilus</i> 986  |                                    | >20,000 ng <sup>a*</sup> | ENA                               |     |
|          |                                        |                                    | 20,000 ng <sup>a</sup>   | ENA1                              |     |
|          |                                        |                                    | >20,000 ng <sup>a*</sup> | ENA2                              |     |
|          |                                        |                                    | 2,000 ng <sup>a</sup>    | ENB1                              |     |
| Protozoa | <i>Leishmania donovani</i> ATCC 39930D |                                    | 10 µg/ml <sup>b</sup>    | ENNs mix (A, A1, B, B1, B2 and Q) | 118 |
|          |                                        |                                    |                          |                                   |     |
|          | <i>Plasmodium falciparum</i> K1        |                                    | 0.27 µg/ml <sup>b</sup>  | ENB                               | 120 |
|          |                                        |                                    | 0.20 µg/ml <sup>b</sup>  | ENB4                              |     |
|          |                                        |                                    | 1.1 µg/ml <sup>b</sup>   | ENC                               |     |
|          |                                        |                                    | 0.46 µg/ml <sup>b</sup>  | ENG                               |     |
|          |                                        |                                    | 1.9 µg/ml <sup>b</sup>   | ENH                               |     |
|          |                                        |                                    | 0.24 µg/ml <sup>b</sup>  | ENI                               |     |
| Fungi    | Yeast                                  | <i>Candida albicans</i> ATCC 90028 | 3.13 µg/ml <sup>a</sup>  | ENA                               | 195 |
|          |                                        |                                    | 6.25 µg/ml <sup>a</sup>  | ENA1                              |     |

|  |                                             |                          |      |     |
|--|---------------------------------------------|--------------------------|------|-----|
|  |                                             | 6.25 µg/ml <sup>a</sup>  | ENB1 |     |
|  | <i>Saccharomyces cerevisiae</i> 7           | 2000 ng <sup>a</sup>     | ENA  | 101 |
|  |                                             | >20,000 ng <sup>a*</sup> | ENA1 |     |
|  |                                             | >20,000 ng <sup>a*</sup> | ENA2 |     |
|  |                                             | >20,000 ng <sup>a*</sup> | ENB1 |     |
|  | <i>Saccharomyces cerevisiae</i> 15          | >20,000 ng <sup>a*</sup> | ENA  |     |
|  |                                             | >20,000 ng <sup>a*</sup> | ENA1 |     |
|  |                                             | 2000 ng <sup>a</sup>     | ENA2 |     |
|  |                                             | >20,000 ng <sup>a*</sup> | ENB1 |     |
|  | <i>Aspergillus flavus</i> CECT 2684         | >20 µg <sup>a*</sup>     | ENB  | 100 |
|  | <i>Aspergillus flavus</i> CECT 2685         | >20 µg <sup>a*</sup>     |      |     |
|  | <i>Aspergillus fumigatus</i> CECT 20366     | >20 µg <sup>a*</sup>     |      |     |
|  | <i>Aspergillus ochraceus</i> CECT 2092      | >20 µg <sup>a*</sup>     |      |     |
|  | <i>Aspergillus parasiticus</i> CECT 2680    | >20 µg <sup>a*</sup>     |      |     |
|  | <i>Beauveria bassiana</i> CECT 20499        | 5 µg <sup>a</sup>        |      |     |
|  | <i>Beauveria bassiana</i> CECT 20191        | 5 µg <sup>a</sup>        |      |     |
|  | <i>Beauveria bassiana</i> CECT 20412        | 5 µg <sup>a</sup>        |      |     |
|  | <i>Fusarium oxysporum</i> CECT 2715         | >20 µg <sup>a*</sup>     |      |     |
|  | <i>Fusarium poae</i> CECT 20165             | >20 µg <sup>a*</sup>     |      |     |
|  | <i>Fusarium proliferatum</i> CECT 20569     | >20 µg <sup>a*</sup>     |      |     |
|  | <i>Fusarium proliferatum</i> CECT 50546     | >20 µg <sup>a*</sup>     |      |     |
|  | <i>Fusarium sporotrichioides</i> CECT 20166 | >20 µg <sup>a*</sup>     |      |     |
|  | <i>Fusarium tricinctum</i> CECT 20150       | >20 µg <sup>a*</sup>     |      |     |
|  | <i>Fusarium verticilloides</i> CECT 2152    | >20 µg <sup>a*</sup>     |      |     |
|  | <i>Fusarium verticilloides</i> CECT 2982    | >20 µg <sup>a*</sup>     |      |     |
|  | <i>Fusarium verticilloides</i> CECT 2987    | >20 µg <sup>a*</sup>     |      |     |
|  | <i>Penicillium expansum</i> CECT 2275       | >20 µg <sup>a*</sup>     |      |     |
|  | <i>Penicillium expansum</i> CECT 2278       | >20 µg <sup>a*</sup>     |      |     |
|  | <i>Trichoderma harzianum</i> T22            | 1 µg <sup>a</sup>        |      |     |
|  | <i>Fusarium avenaceum</i>                   | 100 mg/kg <sup>a</sup>   | ENB  | 65  |
|  | <i>Fusarium graminearum</i>                 | 50 mg/kg <sup>a</sup>    |      |     |
|  | <i>Aspergillus fumigatus</i> ATCC 90906     | >50 µg/ml <sup>a*</sup>  | ENA  | 195 |
|  |                                             | >50 µg/ml <sup>a*</sup>  | ENA1 |     |

|  |                         |                         |      |     |
|--|-------------------------|-------------------------|------|-----|
|  | <i>Botrytis cinerea</i> | >50 µg/ml <sup>a*</sup> | ENB1 | 196 |
|  |                         | >100 µg/ml <sup>a</sup> | ENB  |     |
|  |                         | 75 µg/ml <sup>a</sup>   | ENB1 |     |
|  |                         | >100 µg/ml <sup>a</sup> | ENB2 |     |
|  |                         | >100 µg/ml <sup>a</sup> | ENB4 |     |
|  |                         | >100 µg/ml <sup>a</sup> | ENJ1 |     |
|  |                         | >100 µg/ml <sup>a</sup> | ENJ4 |     |

**Supplementary Table S2:** Effects of ENNs on insects.

\* = not sensitivity at the highest test concentration; a = MIC value.

| Species                          | Sensitivity                                                    | ENN type               | Reference |
|----------------------------------|----------------------------------------------------------------|------------------------|-----------|
| <i>Aphis craccivora</i>          | 10 – 500 mg/L of <i>Cordyceps fumosorosea</i> micelial extract | ENK1                   | 149       |
| <i>Bemisia tabaci</i>            | 10 – 500 mg/L of <i>Cordyceps fumosorosea</i> micelial extract | ENK1                   |           |
| <i>Tenebrio molitor</i>          | > 14.26 µg/g <sup>a</sup>                                      | Enniatin complex       | 150       |
| <i>Galleria mellonella</i>       | 100 µg/g <sup>*</sup>                                          | ENB                    | 148       |
| <i>Choristoneura fumiferana</i>  | 400 µg/g <sup>a</sup>                                          | ENA/A <sub>1</sub>     | 147       |
| <i>Aedes aegypti</i>             | 10-75 µg/ml <sup>a</sup>                                       | ENA / Enniatin complex | 146       |
| <i>Calliphora erythrocephala</i> | 5-10 µg/fly <sup>a</sup>                                       | ENA / Enniatin complex |           |
